# Supplementary material for: Validity and reliability study of the Turkish version of KOOS-ACL questionnaire
Source: PubMed Central journal article supplement — BMC Sports Sci Med Rehabil. 2024 Dec 18;16:247. doi: 10.1186/s13102-024-01036-8 (PMC11657515; doi:10.1186/s13102-024-01036-8), 2024-12-18
Supplement: 13102_2024_1036_MOESM1_ESM.pdf [file 13102_2024_1036_MOESM1_ESM.pdf]

APPENDIX 2: KOOS-ACL

**Instructions:**

Answer every question by checking the appropriate box, only one box for each question. If you are unsure about how to answer a question, please give your best answer.

**Function**

1. How severe is your knee joint stiffness after first waking in the morning?

| None | Mild | Moderate | Severe | Extreme |
|------|------|----------|--------|---------|
|      |      |          |        |         |

2 to 8. The following questions concern your physical function. By this we mean your ability to move around and to look after yourself. For each of the following activities, please indicate the degree of difficulty you have experienced in the last two weeks due to your knee.

|                                                        | None | Mild | Moderate | Severe | Extreme |
|--------------------------------------------------------|------|------|----------|--------|---------|
| Descending Stairs                                      |      |      |          |        |         |
| Standing                                               |      |      |          |        |         |
| Bending to floor/picking up an object                  |      |      |          |        |         |
| Walking on flat surface                                |      |      |          |        |         |
| Lying in bed (rolling over, maintaining knee position) |      |      |          |        |         |
| Sitting                                                |      |      |          |        |         |
| Light domestic duties (cooking, dusting, etc.)         |      |      |          |        |         |

**Sport**

1 to 3. The following questions concern your physical function when being active on a higher level. The questions should be answered thinking of what degree of difficulty you have experienced during the last two weeks due to your knee.

|                                | None | Mild | Moderate | Severe | Extreme |
|--------------------------------|------|------|----------|--------|---------|
| Running                        |      |      |          |        |         |
| Jumping                        |      |      |          |        |         |
| Twisting/pivoting on your knee |      |      |          |        |         |

4. How much are you troubled with lack of confidence in your knee?

| Not At All | Mildly | Moderately | Severely | Totally |
|------------|--------|------------|----------|---------|
|            |        |            |          |         |
